# Supplementary material
Source: PubMed Central journal article supplement (PMC7872415)
Supplement: jp0c08283_si_001.pdf [file jp0c08283_si_001.pdf]

## Supplemental Material

---

### On the Accuracy of the Direct Method to Calculate pKa from Electronic Structure Calculations

*Felipe Ribeiro Dutra<sup>a</sup>, Cleuton de Souza Silva<sup>b</sup> and Rogério Custódio<sup>\*,a</sup>*

*a. Instituto de Química, Universidade Estadual de Campinas, Barão Geraldo, 13083-970 Campinas – São Paulo, Brazil, P. O. Box 6154*

*b. Instituto de Ciências Exatas e Tecnologia, Universidade Federal do Amazonas, Campus de Itacoatiara, 69100-021 Itacoatiara – Amazonas, Brazil*

### Contents

|                                                                                                                                                                                                                                                                                                 |  |
|-------------------------------------------------------------------------------------------------------------------------------------------------------------------------------------------------------------------------------------------------------------------------------------------------|--|
| Table S1. Experimental pKa values and differences between experimental and calculated values for different levels of theory using SMD solvent model and training set 2: acetic, propanoic, and butanoic acids. HF and DFT calculations used aug-cc-pVDZ basis functions. .S3                    |  |
| Table S2. Experimental pKa values and differences between experimental and calculated values for different levels of theory using SMD solvent model and training set 3: pentanoic, 2-chlorobutanoic, and 2-metilbutanoic acids. HF and DFT calculations used aug-cc-pVDZ basis functions.....S4 |  |
| Table S3. Experimental pKa values and differences between experimental and calculated values for HF and different DFT levels with aug-cc-pVTZ basis set, SMD solvent model, and training set 1.....S5                                                                                           |  |
| Table S4. Experimental pKa values and differences between experimental and calculated values for HF and different DFT levels with aug-cc-pVTZ basis set, SMD solvent model, and training set 2.....S6                                                                                           |  |
| Table S5. Experimental pKa values and differences between experimental and calculated values for HF and different DFT levels with aug-cc-pVTZ basis set, SMD solvent model, and training set 3.....S7                                                                                           |  |

\* Corresponding author: e-mail: [rogerct@unicamp.br](mailto:rogerct@unicamp.br), Tel.: +55-19-35213104; fax: +55-19-35213023.

Table S6. Experimental pKa values and differences between experimental and calculated values for different levels of theory using SMD solvent model, one explicit water molecule, and training set 1. HF and DFT calculations used aug-cc-pVDZ basis functions. ....S8

Table S7. Experimental pKa values and differences between experimental and calculated values for different levels of theory using SMD solvent model, one explicit water molecule, and training set 2. HF and DFT calculations used aug-cc-pVDZ basis functions. ....S9

Table S8. Experimental pKa values and differences between experimental and calculated values for different levels of theory using SMD solvent model, one explicit water molecule, and training set 3. HF and DFT calculations used aug-cc-pVDZ basis functions. ....S10

Table S9. Experimental pKa values and differences between experimental and calculated values for HF and different DFT levels with aug-cc-pVTZ basis set, SMD solvent model, one explicit water molecule, and training set 1. ....S11

Table S10. Experimental pKa values and differences between experimental and calculated values for HF and different DFT levels with aug-cc-pVTZ basis set, SMD solvent model, one explicit water molecule, and training set 2. ....S12

Table S11. Experimental pKa values and differences between experimental and calculated values for HF and different DFT levels with aug-cc-pVTZ basis set, SMD solvent model, one explicit water molecule, and training set 3. ....S13

**Table S1.** Experimental pKa values and differences between experimental and calculated values for different levels of theory using SMD solvent model and training set 2: acetic, propanoic, and butanoic acids. HF and DFT calculations used aug-cc-pVDZ basis functions.

| Acids                        | pKa <sup>a</sup><br>(exp) | G4CEP | AM1   | PM6   | HF    | LSDA  | PBE   | B3LYP | CAM<br>B3LYP | WB97XD | M062X | B2PLYP |
|------------------------------|---------------------------|-------|-------|-------|-------|-------|-------|-------|--------------|--------|-------|--------|
| <b>Acetic</b>                | <b>4.76</b>               | 0.24  | -0.28 | 0.18  | -0.04 | 0.08  | 0.52  | -0.20 | -0.28        | 0.50   | 0.39  | -0.15  |
| <b>Propanoic</b>             | <b>4.88</b>               | -0.64 | -0.52 | 0.88  | 0.23  | 0.02  | -0.36 | -0.07 | -0.11        | -0.45  | -0.21 | -0.16  |
| <b>Butanoic</b>              | <b>4.82</b>               | 0.40  | 0.80  | -1.06 | -0.19 | -0.10 | -0.17 | 0.28  | 0.39         | -0.06  | -0.18 | 0.30   |
| <b>Pentanoic</b>             | <b>4.82</b>               | -0.19 | -0.39 | 0.25  | -0.97 | 0.47  | -0.50 | -0.20 | -0.18        | -0.53  | 0.00  | -0.23  |
| <b>Hexanoic</b>              | <b>4.85</b>               | -1.49 | 0.89  | 0.34  | -0.99 | 0.27  | -1.05 | -1.25 | -0.32        | 0.02   | -0.69 | -0.43  |
| <b>Chloroacetic</b>          | <b>2.86</b>               | 0.92  | 0.44  | -0.25 | 1.67  | 2.52  | 2.34  | 1.33  | 1.12         | 2.29   | 2.05  | 1.24   |
| <b>Bromoacetic</b>           | <b>2.90</b>               | 0.34  | -0.36 | -0.28 | 1.37  | 2.61  | 1.82  | 2.06  | 1.87         | 1.61   | 1.56  | 1.84   |
| <b>Trichloroacetic</b>       | <b>0.70</b>               | 1.17  | 3.77  | 2.80  | 5.22  | 5.73  | 6.14  | 6.32  | 5.81         | 5.81   | 5.69  | 5.95   |
| <b>2-Chlorobutanoic</b>      | <b>2.83</b>               | 0.91  | 1.42  | 0.15  | 1.46  | 1.84  | 1.82  | 2.42  | 1.86         | 1.64   | 1.46  | 2.44   |
| <b>3-Chlorobutanoic</b>      | <b>3.98</b>               | -0.30 | 0.24  | 0.66  | 0.41  | 1.19  | 0.79  | 1.19  | 1.02         | 0.86   | 0.75  | 1.06   |
| <b>4-Chlorobutanoic</b>      | <b>4.52</b>               | -0.39 | -0.12 | 0.95  | 0.43  | 0.77  | 0.93  | 1.24  | 1.42         | 1.22   | 1.71  | 1.01   |
| <b>3-Butenoic</b>            | <b>4.35</b>               | 0.06  | 0.50  | -0.13 | 0.70  | 1.14  | 0.82  | 1.15  | 0.11         | 0.77   | -0.08 | 1.01   |
| <b>2-Methylpropanoic</b>     | <b>4.84</b>               | -0.05 | 0.16  | 0.86  | -0.26 | 1.45  | 1.11  | 0.09  | 0.40         | 0.20   | -0.07 | 0.36   |
| <b>2,2-Dimethylpropanoic</b> | <b>5.03</b>               | -0.51 | 0.45  | -0.20 | -0.32 | 0.23  | 0.19  | 0.52  | 0.36         | 0.10   | 0.29  | 0.40   |
| <b>3-Methylbutanoic</b>      | <b>4.77</b>               | -1.17 | 0.34  | 0.39  | -0.19 | 0.30  | -0.06 | 0.30  | 0.44         | -0.78  | 0.17  | 0.18   |
| <b>2-Methylbutanoic</b>      | <b>4.80</b>               | -0.74 | 0.00  | 0.15  | -0.48 | -0.06 | 0.10  | 0.35  | 0.39         | -0.12  | -0.05 | 0.38   |
| <b>2-Butynoic</b>            | <b>2.62</b>               | 1.30  | 1.69  | -0.14 | 1.83  | 2.69  | 1.86  | 2.84  | 2.93         | 2.20   | 2.42  | 1.94   |
| <b>2-Chloropropanoic</b>     | <b>2.83</b>               | 0.95  | 0.06  | 0.08  | 1.71  | 2.14  | 1.83  | 2.54  | 2.34         | 1.95   | 1.42  | 2.23   |
| <b>3-Bromopropanoic</b>      | <b>4.00</b>               | 1.14  | -0.56 | 0.35  | 0.70  | 2.35  | 2.36  | 1.66  | 1.53         | 0.99   | 2.24  | 1.52   |
| <b>3-Chloropropanoic</b>     | <b>3.98</b>               | 0.17  | -0.34 | -0.37 | 1.26  | 2.31  | 1.50  | 1.77  | 1.74         | 2.28   | 2.26  | 1.68   |
| <b>trans-Crotonic</b>        | <b>4.69</b>               | -0.09 | -0.50 | -0.50 | 0.25  | 0.37  | 0.32  | 0.67  | 0.82         | 0.11   | 0.46  | 0.85   |
| <b>Formic</b>                | <b>3.75</b>               | 0.76  | -2.21 | -2.06 | 1.52  | 2.32  | 2.12  | 2.46  | 2.37         | 2.06   | 1.76  | 2.21   |

a. Data from references <sup>64</sup> and <sup>65</sup>.

**Table S2.** Experimental pKa values and differences between experimental and calculated values for different levels of theory using SMD solvent model and training set 3: pentanoic, 2-chlorobutanoic, and 2-metilbutanoic acids. HF and DFT calculations used aug-cc-pVDZ basis functions.

| Acids                 | pKa <sup>a</sup><br>(exp) | G4CEP | AM1   | PM6   | HF    | LSDA  | PBE   | B3LYP | CAM<br>B3LYP | WB97XD | M062X | B2PLYP |
|-----------------------|---------------------------|-------|-------|-------|-------|-------|-------|-------|--------------|--------|-------|--------|
| Acetic                | 4.76                      | 0.25  | -0.63 | 0.00  | -0.04 | -0.67 | 0.05  | -1.06 | -0.97        | 0.18   | -0.08 | -1.01  |
| Propanoic             | 4.88                      | -0.63 | -0.86 | 0.70  | 0.23  | -0.73 | -0.83 | -0.93 | -0.80        | -0.78  | -0.68 | -1.02  |
| Butanoic              | 4.82                      | 0.41  | 0.46  | -1.24 | -0.19 | -0.85 | -0.64 | -0.58 | -0.31        | -0.39  | -0.65 | -0.56  |
| Pentanoic             | 4.82                      | -0.19 | -0.74 | 0.06  | -0.97 | -0.28 | -0.97 | -1.05 | -0.87        | -0.86  | -0.47 | -1.09  |
| Hexanoic              | 4.85                      | -1.48 | 0.55  | 0.16  | -0.99 | -0.48 | -1.52 | -2.11 | -1.01        | -0.30  | -1.15 | -1.30  |
| Chloroacetic          | 2.86                      | 0.92  | 0.09  | -0.43 | 1.67  | 1.77  | 1.86  | 0.47  | 0.42         | 1.97   | 1.59  | 0.38   |
| Bromoacetic           | 2.90                      | 0.35  | -0.71 | -0.46 | 1.37  | 1.86  | 1.35  | 1.20  | 1.18         | 1.28   | 1.10  | 0.97   |
| Trichloroacetic       | 0.70                      | 1.18  | 3.43  | 2.62  | 5.22  | 4.98  | 5.67  | 5.46  | 5.12         | 5.49   | 5.23  | 5.09   |
| 2-Chlorobutanoic      | 2.83                      | 0.92  | 1.08  | -0.03 | 1.46  | 1.09  | 1.35  | 1.56  | 1.17         | 1.31   | 0.99  | 1.57   |
| 3-Chlorobutanoic      | 3.98                      | -0.29 | -0.10 | 0.48  | 0.41  | 0.44  | 0.32  | 0.33  | 0.32         | 0.53   | 0.28  | 0.19   |
| 4-Chlorobutanoic      | 4.52                      | -0.39 | -0.46 | 0.76  | 0.43  | 0.02  | 0.45  | 0.38  | 0.72         | 0.89   | 1.24  | 0.15   |
| 3-Butenoic            | 4.35                      | 0.07  | 0.15  | -0.32 | 0.70  | 0.38  | 0.35  | 0.30  | -0.58        | 0.44   | -0.55 | 0.14   |
| 2-Methylpropanoic     | 4.84                      | -0.04 | -0.19 | 0.68  | -0.26 | 0.70  | 0.63  | -0.76 | -0.29        | -0.12  | -0.54 | -0.50  |
| 2,2-Dimethylpropanoic | 5.03                      | -0.50 | 0.11  | -0.38 | -0.32 | -0.52 | -0.28 | -0.34 | -0.33        | -0.23  | -0.18 | -0.46  |
| 3-Methylbutanoic      | 4.77                      | -1.16 | 0.00  | 0.21  | -0.19 | -0.45 | -0.53 | -0.56 | -0.25        | -1.11  | -0.30 | -0.69  |
| 2-Methylbutanoic      | 4.80                      | -0.73 | -0.34 | -0.03 | -0.48 | -0.81 | -0.38 | -0.51 | -0.30        | -0.45  | -0.52 | -0.48  |
| 2-Butynoic            | 2.62                      | 1.31  | 1.35  | -0.32 | 1.83  | 1.94  | 1.39  | 1.98  | 2.24         | 1.88   | 1.96  | 1.08   |
| 2-Chloropropanoic     | 2.83                      | 0.96  | -0.29 | -0.11 | 1.71  | 1.39  | 1.36  | 1.68  | 1.65         | 1.63   | 0.95  | 1.37   |
| 3-Bromopropanoic      | 4.00                      | 1.14  | -0.91 | 0.17  | 0.70  | 1.60  | 1.88  | 0.80  | 0.84         | 0.67   | 1.78  | 0.65   |
| 3-Chloropropanoic     | 3.98                      | 0.18  | -0.69 | -0.55 | 1.26  | 1.56  | 1.03  | 0.92  | 1.05         | 1.95   | 1.79  | 0.82   |
| trans-Crotonic        | 4.69                      | -0.08 | -0.84 | -0.69 | 0.25  | -0.38 | -0.16 | -0.18 | 0.13         | -0.22  | 0.00  | -0.01  |
| Formic                | 3.75                      | 0.77  | -2.55 | -2.24 | 1.51  | 1.57  | 1.64  | 1.60  | 1.68         | 1.74   | 1.30  | 1.35   |

a. Data from references <sup>64</sup> and <sup>65</sup>.

**Table S3.** Experimental pKa values and differences between experimental and calculated values for HF and different DFT levels with aug-cc-pVTZ basis set, SMD solvent model, and training set 1.

| Acids                 | pKa <sup>a</sup><br>(exp) | HF    | LSDA  | PBE   | B3LYP | CAM<br>B3LYP | WB97XD | M062X | B2PLYP |
|-----------------------|---------------------------|-------|-------|-------|-------|--------------|--------|-------|--------|
| Acetic                | 4.76                      | -0.13 | 0.12  | -0.35 | -0.64 | -0.12        | -0.88  | -0.79 | -0.30  |
| Propanoic             | 4.88                      | -0.90 | -0.23 | -1.24 | -1.11 | -1.39        | -1.72  | -1.06 | -1.41  |
| Butanoic              | 4.82                      | -1.17 | -0.04 | -1.03 | -1.58 | -1.23        | -1.53  | -0.85 | -0.88  |
| Pentanoic             | 4.82                      | -1.35 | -0.09 | -1.37 | -1.50 | -1.11        | -1.28  | -1.17 | -1.11  |
| Hexanoic              | 4.85                      | -2.04 | 0.21  | -1.96 | -1.25 | -1.79        | -1.38  | -1.09 | -1.70  |
| Chloroacetic          | 2.86                      | 1.72  | -0.26 | -0.53 | 2.08  | 1.19         | 0.54   | 1.29  | 1.21   |
| Bromoacetic           | 2.90                      | 0.79  | -0.18 | 0.52  | 0.72  | 0.43         | 0.23   | 0.56  | 0.34   |
| Trichloroacetic       | 0.70                      | 4.37  | -1.12 | 5.04  | 4.42  | 4.30         | 4.33   | 3.85  | 4.50   |
| 2-Chlorobutanoic      | 2.83                      | 1.04  | -0.29 | 0.84  | 1.04  | 1.00         | 0.43   | 0.33  | 1.27   |
| 3-Chlorobutanoic      | 3.98                      | -0.09 | -0.13 | -0.12 | -0.28 | -0.25        | -0.24  | -0.03 | -0.18  |
| 4-Chlorobutanoic      | 4.52                      | -0.78 | 0.22  | 0.04  | -0.64 | 0.09         | 0.08   | -0.14 | -0.17  |
| 3-Butenoic            | 4.35                      | -0.62 | -0.36 | 0.19  | -0.63 | -1.12        | -0.62  | -0.63 | 0.12   |
| 2-Methylpropanoic     | 4.84                      | -0.85 | 0.42  | -1.06 | 0.21  | -0.81        | -0.52  | -0.39 | -0.87  |
| 2,2-Dimethylpropanoic | 5.03                      | -1.09 | 0.26  | -0.73 | -1.04 | -0.96        | -0.98  | -0.87 | -0.91  |
| 3-Methylbutanoic      | 4.77                      | -1.69 | 0.21  | -0.95 | -1.39 | -0.84        | -0.79  | -0.29 | -1.00  |
| 2-Methylbutanoic      | 4.80                      | -0.73 | 1.43  | -1.55 | -0.61 | -1.58        | -1.49  | -0.94 | -1.28  |
| 2-Butynoic            | 2.62                      | 1.79  | -0.56 | 0.62  | 0.96  | 1.98         | 1.68   | 0.76  | 0.19   |
| 2-Chloropropanoic     | 2.83                      | 0.74  | -0.76 | 0.86  | 0.60  | 0.82         | 0.91   | 0.72  | 0.89   |
| 3-Bromopropanoic      | 4.00                      | 0.77  | 0.58  | 1.55  | 0.63  | 0.25         | 1.55   | 0.49  | 0.24   |
| 3-Chloropropanoic     | 3.98                      | 0.03  | -0.28 | 0.61  | 0.12  | 0.50         | 1.11   | 0.35  | 0.47   |
| trans-Crotonic        | 4.69                      | -0.68 | 0.45  | -0.53 | -1.07 | -0.42        | -0.38  | -0.72 | -0.37  |
| Formic                | 3.75                      | 0.86  | 0.41  | 1.15  | 0.97  | 1.08         | 0.93   | 0.63  | 0.96   |

a. Data from references <sup>64</sup> and <sup>65</sup>.

**Table S4.** Experimental pKa values and differences between experimental and calculated values for HF and different DFT levels with aug-cc-pVTZ basis set, SMD solvent model, and training set 2.

| Acids                 | pKa <sup>a</sup><br>(exp) | HF    | LSDA  | PBE   | B3LYP | CAM<br>B3LYP | WB97XD | M062X | B2PLYP |
|-----------------------|---------------------------|-------|-------|-------|-------|--------------|--------|-------|--------|
| Acetic                | 4.76                      | 0.61  | 0.17  | 0.53  | 0.47  | 0.79         | 0.50   | 0.11  | 0.56   |
| Propanoic             | 4.88                      | -0.17 | -0.18 | -0.37 | 0.00  | -0.48        | -0.34  | -0.16 | -0.55  |
| Butanoic              | 4.82                      | -0.44 | 0.01  | -0.16 | -0.47 | -0.32        | -0.16  | 0.05  | -0.02  |
| Pentanoic             | 4.82                      | -0.62 | -0.03 | -0.49 | -0.39 | -0.19        | 0.10   | -0.27 | -0.24  |
| Hexanoic              | 4.85                      | -1.30 | 0.26  | -1.09 | -0.15 | -0.87        | -0.01  | -0.19 | -0.83  |
| Chloroacetic          | 2.86                      | 2.46  | -0.21 | 0.34  | 3.19  | 2.11         | 1.91   | 2.19  | 2.08   |
| Bromoacetic           | 2.90                      | 1.53  | -0.13 | 1.39  | 1.83  | 1.35         | 1.60   | 1.46  | 1.21   |
| Trichloroacetic       | 0.70                      | 5.10  | -1.07 | 5.91  | 5.53  | 5.21         | 5.71   | 4.76  | 5.36   |
| 2-Chlorobutanoic      | 2.83                      | 1.77  | -0.24 | 1.71  | 2.15  | 1.92         | 1.81   | 1.23  | 2.14   |
| 3-Chlorobutanoic      | 3.98                      | 0.64  | -0.08 | 0.75  | 0.83  | 0.66         | 1.14   | 0.87  | 0.69   |
| 4-Chlorobutanoic      | 4.52                      | -0.05 | 0.27  | 0.91  | 0.46  | 1.01         | 1.45   | 0.76  | 0.70   |
| 3-Butenoic            | 4.35                      | 0.11  | -0.31 | 1.06  | 0.48  | -0.20        | 0.76   | 0.27  | 0.99   |
| 2-Methylpropanoic     | 4.84                      | -0.12 | 0.47  | -0.19 | 1.32  | 0.10         | 0.85   | 0.51  | 0.00   |
| 2,2-Dimethylpropanoic | 5.03                      | -0.35 | 0.31  | 0.14  | 0.07  | -0.04        | 0.40   | 0.03  | -0.04  |
| 3-Methylbutanoic      | 4.77                      | -0.96 | 0.26  | -0.08 | -0.28 | 0.08         | 0.59   | 0.61  | -0.13  |
| 2-Methylbutanoic      | 4.80                      | 0.00  | 1.48  | -0.68 | 0.50  | -0.67        | -0.12  | -0.04 | -0.42  |
| 2-Butynoic            | 2.62                      | 2.53  | -0.51 | 1.50  | 2.07  | 2.89         | 3.05   | 1.67  | 1.05   |
| 2-Chloropropanoic     | 2.83                      | 1.47  | -0.71 | 1.73  | 1.71  | 1.73         | 2.29   | 1.62  | 1.76   |
| 3-Bromopropanoic      | 4.00                      | 1.50  | 0.63  | 2.42  | 1.74  | 1.16         | 2.92   | 1.40  | 1.11   |
| 3-Chloropropanoic     | 3.98                      | 0.76  | -0.23 | 1.48  | 1.23  | 1.41         | 2.49   | 1.25  | 1.33   |
| trans-Crotonic        | 4.69                      | 0.05  | 0.50  | 0.35  | 0.04  | 0.49         | 1.00   | 0.18  | 0.49   |
| Formic                | 3.75                      | 1.59  | 0.46  | 2.03  | 2.08  | 1.99         | 2.31   | 1.53  | 1.82   |

a. Data from references <sup>64</sup> and <sup>65</sup>.

**Table S5.** Experimental pKa values and differences between experimental and calculated values for HF and different DFT levels with aug-cc-pVTZ basis set, SMD solvent model, and training set 3.

| Acids                 | pKa <sup>a</sup><br>(exp) | HF    | LSDA  | PBE   | B3LYP | CAM<br>B3LYP | WB97XD | M062X | B2PLYP |
|-----------------------|---------------------------|-------|-------|-------|-------|--------------|--------|-------|--------|
| Acetic                | 4.76                      | 0.22  | -0.23 | 0.35  | -0.28 | 0.44         | -0.10  | -0.19 | 0.07   |
| Propanoic             | 4.88                      | -0.55 | -0.58 | -0.55 | -0.76 | -0.83        | -0.94  | -0.47 | -1.04  |
| Butanoic              | 4.82                      | -0.83 | -0.39 | -0.34 | -1.22 | -0.67        | -0.75  | -0.26 | -0.51  |
| Pentanoic             | 4.82                      | -1.00 | -0.44 | -0.67 | -1.14 | -0.55        | -0.50  | -0.58 | -0.73  |
| Hexanoic              | 4.85                      | -1.69 | -0.14 | -1.27 | -0.90 | -1.22        | -0.60  | -0.49 | -1.32  |
| Chloroacetic          | 2.86                      | 2.07  | -0.61 | 0.16  | 2.43  | 1.76         | 1.32   | 1.88  | 1.58   |
| Bromoacetic           | 2.90                      | 1.14  | -0.53 | 1.21  | 1.07  | 0.99         | 1.00   | 1.15  | 0.71   |
| Trichloroacetic       | 0.70                      | 4.71  | -1.47 | 5.73  | 4.77  | 4.86         | 5.11   | 4.45  | 4.87   |
| 2-Chlorobutanoic      | 2.83                      | 1.39  | -0.64 | 1.53  | 1.39  | 1.56         | 1.21   | 0.92  | 1.65   |
| 3-Chlorobutanoic      | 3.98                      | 0.25  | -0.48 | 0.57  | 0.08  | 0.31         | 0.54   | 0.57  | 0.19   |
| 4-Chlorobutanoic      | 4.52                      | -0.43 | -0.13 | 0.73  | -0.29 | 0.65         | 0.86   | 0.45  | 0.21   |
| 3-Butenoic            | 4.35                      | -0.27 | -0.71 | 0.88  | -0.28 | -0.55        | 0.16   | -0.04 | 0.50   |
| 2-Methylpropanoic     | 4.84                      | -0.50 | 0.07  | -0.37 | 0.56  | -0.25        | 0.26   | 0.21  | -0.50  |
| 2,2-Dimethylpropanoic | 5.03                      | -0.74 | -0.09 | -0.04 | -0.68 | -0.40        | -0.20  | -0.28 | -0.53  |
| 3-Methylbutanoic      | 4.77                      | -1.34 | -0.14 | -0.26 | -1.04 | -0.27        | -0.01  | 0.31  | -0.63  |
| 2-Methylbutanoic      | 4.80                      | -0.38 | 1.07  | -0.86 | -0.25 | -1.02        | -0.71  | -0.34 | -0.91  |
| 2-Butynoic            | 2.62                      | 2.14  | -0.91 | 1.32  | 1.32  | 2.54         | 2.46   | 1.36  | 0.56   |
| 2-Chloropropanoic     | 2.83                      | 1.08  | -1.11 | 1.55  | 0.96  | 1.38         | 1.69   | 1.31  | 1.27   |
| 3-Bromopropanoic      | 4.00                      | 1.12  | 0.22  | 2.24  | 0.98  | 0.81         | 2.33   | 1.09  | 0.61   |
| 3-Chloropropanoic     | 3.98                      | 0.37  | -0.63 | 1.30  | 0.47  | 1.06         | 1.89   | 0.94  | 0.84   |
| trans-Crotonic        | 4.69                      | -0.33 | 0.10  | 0.17  | -0.72 | 0.14         | 0.40   | -0.12 | 0.00   |
| Formic                | 3.75                      | 1.20  | 0.06  | 1.85  | 1.33  | 1.64         | 1.71   | 1.22  | 1.33   |

a. Data from references <sup>64</sup> and <sup>65</sup>.

**Table S6.** Experimental pKa values and differences between experimental and calculated values for different levels of theory using SMD solvent model, one explicit water molecule, and training set 1. HF and DFT calculations used aug-cc-pVDZ basis functions.

| Acids                 | pKa <sup>a</sup><br>(exp) | G4CEP | AM1   | PM6   | HF    | LSDA  | PBE   | B3LYP | CAM<br>B3LYP | WB97XD | M062X | B2PLYP |
|-----------------------|---------------------------|-------|-------|-------|-------|-------|-------|-------|--------------|--------|-------|--------|
| Acetic                | 4.76                      | 0.37  | 0.09  | 0.62  | -0.82 | -0.35 | -2.12 | -0.18 | -0.13        | -1.15  | -0.62 | -0.33  |
| Propanoic             | 4.88                      | 0.83  | 0.90  | -0.47 | -2.19 | -0.41 | -1.35 | -0.73 | -1.58        | -0.58  | -0.25 | -0.67  |
| Butanoic              | 4.82                      | 0.82  | 0.37  | 0.00  | -1.01 | -0.52 | -0.36 | -1.01 | -0.72        | -0.81  | -1.59 | -0.63  |
| Pentanoic             | 4.82                      | 0.24  | -0.42 | 0.87  | -2.05 | -0.91 | -1.85 | -2.14 | -1.80        | -2.00  | -0.51 | -2.14  |
| Hexanoic              | 4.85                      | 0.25  | -0.45 | 0.97  | -1.63 | -0.46 | -1.05 | -1.27 | -1.02        | -1.14  | -0.54 | -1.34  |
| Chloroacetic          | 2.86                      | 0.35  | 0.38  | 0.23  | 1.39  | 0.73  | 0.84  | 0.25  | 0.43         | 0.84   | 0.68  | 0.43   |
| Bromoacetic           | 2.90                      | -0.70 | -0.52 | -0.92 | 0.35  | 0.62  | 0.73  | 0.17  | 0.28         | 0.24   | -0.06 | 0.13   |
| Trichloroacetic       | 0.70                      | 0.61  | 3.25  | 1.99  | 4.25  | 1.51  | 2.14  | 2.69  | 2.20         | 2.77   | 2.84  | 2.67   |
| 2-Chlorobutanoic      | 2.83                      | 0.21  | 0.18  | -0.92 | 0.77  | 0.53  | 0.04  | 0.45  | 0.80         | 0.03   | 0.08  | 0.93   |
| 3-Chlorobutanoic      | 3.98                      | -0.79 | -0.94 | 1.06  | 1.03  | -0.01 | 0.45  | 0.69  | 0.12         | -0.30  | 0.07  | 0.42   |
| 4-Chlorobutanoic      | 4.52                      | -0.40 | -0.73 | 0.63  | -0.92 | -0.26 | 0.62  | -0.10 | -0.04        | 0.07   | -0.79 | -0.16  |
| 3-Butenoic            | 4.35                      | 0.24  | -0.55 | -0.14 | -0.61 | 0.59  | -0.41 | -0.70 | -0.75        | -0.63  | -0.57 | -1.11  |
| 2-Methylpropanoic     | 4.84                      | 0.55  | -0.95 | -0.23 | -0.39 | -0.14 | -0.15 | -0.43 | -0.04        | -0.11  | -0.20 | 0.24   |
| 2,2-Dimethylpropanoic | 5.03                      | -0.32 | 0.01  | -1.20 | -1.14 | -0.41 | -1.04 | -0.66 | -1.04        | -0.64  | -0.45 | -0.64  |
| 3-Methylbutanoic      | 4.77                      | 0.37  | -0.40 | 2.09  | 0.24  | -0.53 | -0.62 | -0.80 | -0.49        | -0.15  | -0.30 | -0.47  |
| 2-Methylbutanoic      | 4.80                      | -0.70 | 0.46  | 0.24  | -0.75 | -0.45 | -0.20 | -0.60 | -0.56        | -0.12  | -0.32 | -0.59  |
| 2-Butynoic            | 2.62                      | -1.33 | 1.43  | -2.25 | 0.46  | -0.03 | 0.38  | 0.75  | 0.96         | 0.72   | 0.61  | 1.05   |
| 2-Chloropropanoic     | 2.83                      | -0.30 | 0.27  | 0.30  | 1.50  | 0.07  | 0.88  | 0.76  | 0.32         | 0.42   | -0.01 | 0.44   |
| 3-Bromopropanoic      | 4.00                      | 0.49  | 0.62  | -0.15 | -0.16 | -0.61 | 1.46  | 1.07  | 1.05         | 0.50   | 0.65  | 0.90   |
| 3-Chloropropanoic     | 3.98                      | 0.13  | -0.19 | 0.61  | 0.77  | 0.32  | 1.58  | 1.23  | 1.25         | 1.63   | 1.11  | 0.39   |
| trans-Crotonic        | 4.69                      | -0.81 | -0.44 | 0.12  | -0.66 | -0.35 | -0.86 | -0.61 | -0.46        | -0.83  | -0.33 | -0.46  |
| Formic                | 3.75                      | -0.12 | -2.36 | -3.46 | 1.57  | 1.07  | 0.90  | 1.16  | 1.23         | 1.28   | 0.50  | 0.92   |

a. Data from references <sup>64</sup> and <sup>65</sup>.



**Table S7.** Experimental pKa values and differences between experimental and calculated values for different levels of theory using SMD solvent model, one explicit water molecule, and training set 2. HF and DFT calculations used aug-cc-pVDZ basis functions.

| Acids                 | pKa <sup>a</sup><br>(exp) | G4CEP | AM1   | PM6   | HF    | LSDA  | PBE   | B3LYP | CAM<br>B3LYP | WB97XD | M062X | B2PLYP |
|-----------------------|---------------------------|-------|-------|-------|-------|-------|-------|-------|--------------|--------|-------|--------|
| Acetic                | 4.76                      | -0.31 | -0.37 | 0.57  | 0.52  | 0.08  | -0.84 | 0.46  | 0.68         | -0.30  | 0.20  | 0.21   |
| Propanoic             | 4.88                      | 0.16  | 0.45  | -0.52 | -0.85 | 0.02  | -0.08 | -0.09 | -0.77        | 0.27   | 0.57  | -0.13  |
| Butanoic              | 4.82                      | 0.14  | -0.08 | -0.05 | 0.33  | -0.10 | 0.92  | -0.37 | 0.09         | 0.04   | -0.77 | -0.09  |
| Pentanoic             | 4.82                      | -0.43 | -0.88 | 0.83  | -0.72 | -0.48 | -0.57 | -1.50 | -0.99        | -1.15  | 0.31  | -1.60  |
| Hexanoic              | 4.85                      | -0.42 | -0.91 | 0.92  | -0.29 | -0.03 | 0.22  | -0.62 | -0.21        | -0.29  | 0.28  | -0.79  |
| Chloroacetic          | 2.86                      | -0.33 | -0.07 | 0.18  | 2.73  | 1.15  | 2.11  | 0.89  | 1.24         | 1.69   | 1.50  | 0.97   |
| Bromoacetic           | 2.90                      | -1.37 | -0.97 | -0.97 | 1.69  | 1.05  | 2.01  | 0.82  | 1.09         | 1.09   | 0.76  | 0.67   |
| Trichloroacetic       | 0.70                      | -0.06 | 2.80  | 1.94  | 5.59  | 1.94  | 3.42  | 3.33  | 3.01         | 3.62   | 3.66  | 3.22   |
| 2-Chlorobutanoic      | 2.83                      | -0.47 | -0.27 | -0.97 | 2.10  | 0.95  | 1.32  | 1.10  | 1.61         | 0.87   | 0.90  | 1.47   |
| 3-Chlorobutanoic      | 3.98                      | -1.46 | -1.40 | 1.02  | 2.37  | 0.42  | 1.72  | 1.33  | 0.93         | 0.55   | 0.89  | 0.96   |
| 4-Chlorobutanoic      | 4.52                      | -1.08 | -1.18 | 0.58  | 0.42  | 0.17  | 1.90  | 0.54  | 0.77         | 0.92   | 0.02  | 0.39   |
| 3-Butenoic            | 4.35                      | -0.43 | -1.00 | -0.19 | 0.73  | 1.02  | 0.86  | -0.06 | 0.07         | 0.22   | 0.25  | -0.57  |
| 2-Methylpropanoic     | 4.84                      | -0.12 | -1.41 | -0.28 | 0.95  | 0.29  | 1.12  | 0.21  | 0.77         | 0.73   | 0.62  | 0.79   |
| 2,2-Dimethylpropanoic | 5.03                      | -0.99 | -0.45 | -1.25 | 0.20  | 0.02  | 0.23  | -0.02 | -0.23        | 0.21   | 0.37  | -0.09  |
| 3-Methylbutanoic      | 4.77                      | -0.30 | -0.85 | 2.05  | 1.58  | -0.10 | 0.66  | -0.16 | 0.32         | 0.70   | 0.51  | 0.08   |
| 2-Methylbutanoic      | 4.80                      | -1.37 | 0.01  | 0.20  | 0.59  | -0.03 | 1.08  | 0.04  | 0.25         | 0.73   | 0.50  | -0.05  |
| 2-Butynoic            | 2.62                      | -2.00 | 0.98  | -2.30 | 1.80  | 0.40  | 1.66  | 1.39  | 1.78         | 1.57   | 1.43  | 1.60   |
| 2-Chloropropanoic     | 2.83                      | -0.97 | -0.19 | 0.26  | 2.84  | 0.50  | 2.16  | 1.41  | 1.14         | 1.27   | 0.81  | 0.98   |
| 3-Bromopropanoic      | 4.00                      | -0.18 | 0.17  | -0.20 | 1.18  | -0.18 | 2.74  | 1.72  | 1.86         | 1.35   | 1.46  | 1.45   |
| 3-Chloropropanoic     | 3.98                      | -0.54 | -0.65 | 0.56  | 2.11  | 0.74  | 2.86  | 1.87  | 2.06         | 2.48   | 1.93  | 0.94   |
| trans-Crotonic        | 4.69                      | -1.48 | -0.89 | 0.07  | 0.68  | 0.08  | 0.41  | 0.03  | 0.35         | 0.02   | 0.49  | 0.09   |
| Formic                | 3.75                      | -0.79 | -2.82 | -3.51 | 2.91  | 1.49  | 2.18  | 1.80  | 2.04         | 2.13   | 1.31  | 1.46   |

a. Data from references <sup>64</sup> and <sup>65</sup>.

**Table S8.** Experimental pKa values and differences between experimental and calculated values for different levels of theory using SMD solvent model, one explicit water molecule, and training set 3. HF and DFT calculations used aug-cc-pVDZ basis functions.

| Acids                 | pKa <sup>a</sup><br>(exp) | G4CEP | AM1   | PM6   | HF    | LSDA  | PBE   | B3LYP | CAM<br>B3LYP | WB97XD | M062X | B2PLYP |
|-----------------------|---------------------------|-------|-------|-------|-------|-------|-------|-------|--------------|--------|-------|--------|
| Acetic                | 4.76                      | 0.45  | 0.01  | 0.55  | -0.14 | -0.07 | -1.45 | 0.59  | 0.39         | -0.45  | -0.37 | 0.27   |
| Propanoic             | 4.88                      | 0.92  | 0.83  | -0.54 | -1.51 | -0.13 | -0.68 | 0.03  | -1.06        | 0.12   | 0.00  | -0.07  |
| Butanoic              | 4.82                      | 0.90  | 0.30  | -0.07 | -0.33 | -0.24 | 0.31  | -0.25 | -0.20        | -0.11  | -1.34 | -0.03  |
| Pentanoic             | 4.82                      | 0.33  | -0.50 | 0.81  | -1.37 | -0.63 | -1.18 | -1.38 | -1.28        | -1.30  | -0.26 | -1.54  |
| Hexanoic              | 4.85                      | 0.33  | -0.53 | 0.90  | -0.95 | -0.18 | -0.39 | -0.50 | -0.50        | -0.44  | -0.29 | -0.73  |
| Chloroacetic          | 2.86                      | 0.43  | 0.31  | 0.16  | 2.08  | 1.00  | 1.51  | 1.01  | 0.95         | 1.54   | 0.93  | 1.03   |
| Bromoacetic           | 2.90                      | -0.61 | -0.59 | -0.99 | 1.03  | 0.90  | 1.40  | 0.94  | 0.80         | 0.94   | 0.19  | 0.73   |
| Trichloroacetic       | 0.70                      | 0.70  | 3.18  | 1.92  | 4.93  | 1.79  | 2.81  | 3.45  | 2.72         | 3.47   | 3.09  | 3.27   |
| 2-Chlorobutanoic      | 2.83                      | 0.29  | 0.11  | -0.98 | 1.45  | 0.81  | 0.71  | 1.22  | 1.32         | 0.72   | 0.33  | 1.53   |
| 3-Chlorobutanoic      | 3.98                      | -0.71 | -1.01 | 1.00  | 1.71  | 0.27  | 1.11  | 1.45  | 0.64         | 0.40   | 0.32  | 1.02   |
| 4-Chlorobutanoic      | 4.52                      | -0.32 | -0.80 | 0.57  | -0.24 | 0.02  | 1.29  | 0.67  | 0.48         | 0.77   | -0.55 | 0.44   |
| 3-Butenoic            | 4.35                      | 0.33  | -0.62 | -0.21 | 0.07  | 0.87  | 0.25  | 0.06  | -0.22        | 0.07   | -0.32 | -0.51  |
| 2-Methylpropanoic     | 4.84                      | 0.64  | -1.03 | -0.30 | 0.30  | 0.14  | 0.51  | 0.33  | 0.48         | 0.59   | 0.05  | 0.85   |
| 2,2-Dimethylpropanoic | 5.03                      | -0.23 | -0.07 | -1.26 | -0.46 | -0.13 | -0.38 | 0.10  | -0.52        | 0.06   | -0.20 | -0.04  |
| 3-Methylbutanoic      | 4.77                      | 0.45  | -0.47 | 2.03  | 0.92  | -0.25 | 0.05  | -0.03 | 0.03         | 0.55   | -0.06 | 0.14   |
| 2-Methylbutanoic      | 4.80                      | -0.62 | 0.39  | 0.18  | -0.07 | -0.17 | 0.47  | 0.16  | -0.04        | 0.58   | -0.07 | 0.01   |
| 2-Butynoic            | 2.62                      | -1.25 | 1.36  | -2.32 | 1.14  | 0.25  | 1.05  | 1.51  | 1.49         | 1.42   | 0.86  | 1.65   |
| 2-Chloropropanoic     | 2.83                      | -0.22 | 0.19  | 0.24  | 2.18  | 0.35  | 1.55  | 1.53  | 0.85         | 1.12   | 0.24  | 1.04   |
| 3-Bromopropanoic      | 4.00                      | 0.58  | 0.55  | -0.22 | 0.52  | -0.33 | 2.13  | 1.84  | 1.57         | 1.20   | 0.89  | 1.51   |
| 3-Chloropropanoic     | 3.98                      | 0.22  | -0.27 | 0.55  | 1.45  | 0.60  | 2.25  | 2.00  | 1.77         | 2.33   | 1.36  | 0.99   |
| trans-Crotonic        | 4.69                      | -0.72 | -0.51 | 0.05  | 0.02  | -0.07 | -0.19 | 0.16  | 0.06         | -0.13  | -0.08 | 0.14   |
| Formic                | 3.75                      | -0.04 | -2.43 | -3.53 | 2.25  | 1.35  | 1.57  | 1.92  | 1.75         | 1.98   | 0.74  | 1.52   |

a. Data from references <sup>64</sup> and <sup>65</sup>.

**Table S9.** Experimental pKa values and differences between experimental and calculated values for HF and different DFT levels with aug-cc-pVTZ basis set, SMD solvent model, one explicit water molecule, and training set 1.

| Acids                 | pKa <sup>a</sup><br>(exp) | HF    | LSDA  | PBE   | B3LYP | CAM<br>B3LYP | WB97XD | M062X | B2PLYP |
|-----------------------|---------------------------|-------|-------|-------|-------|--------------|--------|-------|--------|
| Acetic                | 4.76                      | -0.09 | -1.07 | -0.07 | -0.26 | -1.23        | -0.72  | -0.88 | -0.09  |
| Propanoic             | 4.88                      | -2.02 | -0.52 | -1.11 | -1.60 | -1.44        | -0.95  | -0.87 | -0.44  |
| Butanoic              | 4.82                      | -0.99 | -0.56 | 0.07  | -0.15 | -0.63        | -0.63  | -0.87 | -0.34  |
| Pentanoic             | 4.82                      | -1.96 | -0.97 | -1.91 | -1.15 | -1.05        | -1.80  | -0.87 | -1.89  |
| Hexanoic              | 4.85                      | -1.98 | 0.19  | -1.12 | -1.41 | -1.19        | -0.83  | -0.81 | -0.58  |
| Chloroacetic          | 2.86                      | 1.22  | 0.72  | 0.64  | 1.16  | 0.96         | 0.92   | 0.61  | 0.42   |
| Bromoacetic           | 2.90                      | 0.78  | 0.37  | -0.28 | 0.66  | 0.73         | -0.20  | 0.62  | 0.21   |
| Trichloroacetic       | 0.70                      | 3.18  | 1.16  | 1.91  | 2.15  | 1.95         | 2.71   | 2.20  | 2.63   |
| 2-Chlorobutanoic      | 2.83                      | -0.84 | 0.65  | 0.04  | 0.67  | 0.50         | 0.01   | 0.71  | 0.73   |
| 3-Chlorobutanoic      | 3.98                      | 0.16  | -0.04 | 0.02  | -0.44 | -0.21        | -0.47  | 0.08  | -0.20  |
| 4-Chlorobutanoic      | 4.52                      | 0.42  | -0.25 | 0.45  | 0.59  | 0.57         | 0.13   | 0.94  | 0.18   |
| 3-Butenoic            | 4.35                      | -0.54 | -0.59 | -0.42 | -0.44 | -0.38        | -0.50  | -0.29 | -0.69  |
| 2-Methylpropanoic     | 4.84                      | 0.29  | -0.25 | -0.59 | -0.25 | -0.15        | -0.03  | -0.13 | -0.13  |
| 2,2-Dimethylpropanoic | 5.03                      | -1.07 | -0.14 | -0.52 | -0.82 | -0.01        | -0.12  | -0.76 | -0.55  |
| 3-Methylbutanoic      | 4.77                      | -0.78 | -0.18 | 0.20  | -1.27 | -1.08        | -0.51  | -0.19 | -0.68  |
| 2-Methylbutanoic      | 4.80                      | -0.45 | -0.10 | -0.25 | -0.02 | -0.39        | 0.28   | -1.12 | -1.39  |
| 2-Butynoic            | 2.62                      | 1.93  | 0.30  | 0.30  | 0.22  | 1.10         | 0.68   | 0.44  | 0.41   |
| 2-Chloropropanoic     | 2.83                      | -0.38 | -0.12 | 0.61  | 0.38  | -0.10        | 0.58   | 0.11  | 0.57   |
| 3-Bromopropanoic      | 4.00                      | 0.98  | 0.73  | 1.42  | 0.35  | 0.49         | -0.05  | -0.07 | 0.98   |
| 3-Chloropropanoic     | 3.98                      | 0.22  | 0.18  | 0.63  | 0.57  | 0.93         | 1.69   | 0.39  | 0.18   |
| trans-Crotonic        | 4.69                      | -0.03 | -0.40 | -0.91 | 0.11  | -0.15        | -1.15  | 0.29  | -0.52  |
| Formic                | 3.75                      | 1.94  | 0.89  | 0.89  | 0.95  | 0.79         | 0.96   | 0.48  | 1.18   |

a. Data from references <sup>64</sup> and <sup>65</sup>.

**Table S10.** Experimental pKa values and differences between experimental and calculated values for HF and different DFT levels with aug-cc-pVTZ basis set, SMD solvent model, one explicit water molecule, and training set 2.

| Acids                 | pKa <sup>a</sup><br>(exp) | HF    | LSDA  | PBE   | B3LYP | CAM<br>B3LYP | WB97XD | M062X | B2PLYP |
|-----------------------|---------------------------|-------|-------|-------|-------|--------------|--------|-------|--------|
| Acetic                | 4.76                      | 0.94  | -0.35 | 0.30  | 0.41  | -0.13        | 0.05   | -0.01 | 0.20   |
| Propanoic             | 4.88                      | -0.99 | 0.19  | -0.74 | -0.93 | -0.34        | -0.18  | 0.00  | -0.15  |
| Butanoic              | 4.82                      | 0.05  | 0.16  | 0.44  | 0.52  | 0.47         | 0.14   | 0.01  | -0.05  |
| Pentanoic             | 4.82                      | -0.92 | -0.26 | -1.54 | -0.48 | 0.05         | -1.04  | 0.01  | -1.60  |
| Hexanoic              | 4.85                      | -0.95 | 0.91  | -0.75 | -0.75 | -0.09        | -0.07  | 0.06  | -0.29  |
| Chloroacetic          | 2.86                      | 2.25  | 1.43  | 1.01  | 1.83  | 2.06         | 1.68   | 1.49  | 0.71   |
| Bromoacetic           | 2.90                      | 1.82  | 1.09  | 0.09  | 1.32  | 1.83         | 0.57   | 1.49  | 0.50   |
| Trichloroacetic       | 0.70                      | 4.22  | 1.88  | 2.27  | 2.81  | 3.05         | 3.48   | 3.08  | 2.92   |
| 2-Chlorobutanoic      | 2.83                      | 0.19  | 1.36  | 0.41  | 1.34  | 1.60         | 0.78   | 1.58  | 1.02   |
| 3-Chlorobutanoic      | 3.98                      | 1.20  | 0.68  | 0.38  | 0.23  | 0.89         | 0.29   | 0.96  | 0.09   |
| 4-Chlorobutanoic      | 4.52                      | 1.45  | 0.47  | 0.82  | 1.26  | 1.67         | 0.90   | 1.82  | 0.47   |
| 3-Butenoic            | 4.35                      | 0.50  | 0.13  | -0.05 | 0.23  | 0.72         | 0.27   | 0.58  | -0.40  |
| 2-Methylpropanoic     | 4.84                      | 1.32  | 0.47  | -0.22 | 0.41  | 0.95         | 0.73   | 0.75  | 0.16   |
| 2,2-Dimethylpropanoic | 5.03                      | -0.04 | 0.58  | -0.15 | -0.15 | 1.09         | 0.65   | 0.11  | -0.26  |
| 3-Methylbutanoic      | 4.77                      | 0.26  | 0.54  | 0.57  | -0.60 | 0.02         | 0.25   | 0.68  | -0.40  |
| 2-Methylbutanoic      | 4.80                      | 0.59  | 0.62  | 0.12  | 0.65  | 0.71         | 1.05   | -0.25 | -1.10  |
| 2-Butynoic            | 2.62                      | 2.96  | 1.02  | 0.67  | 0.88  | 2.20         | 1.44   | 1.31  | 0.70   |
| 2-Chloropropanoic     | 2.83                      | 0.66  | 0.59  | 0.98  | 1.04  | 1.00         | 1.34   | 0.99  | 0.85   |
| 3-Bromopropanoic      | 4.00                      | 2.01  | 1.45  | 1.79  | 1.02  | 1.59         | 0.72   | 0.81  | 1.27   |
| 3-Chloropropanoic     | 3.98                      | 1.25  | 0.89  | 1.00  | 1.24  | 2.03         | 2.45   | 1.26  | 0.47   |
| trans-Crotonic        | 4.69                      | 1.00  | 0.32  | -0.55 | 0.78  | 0.95         | -0.38  | 1.17  | -0.23  |
| Formic                | 3.75                      | 2.97  | 1.61  | 1.26  | 1.62  | 1.89         | 1.73   | 1.35  | 1.47   |

a. Data from references <sup>64</sup> and <sup>65</sup>.

**Table S11.** Experimental pKa values and differences between experimental and calculated values for HF and different DFT levels with aug-cc-pVTZ basis set, SMD solvent model, one explicit water molecule, and training set 3.

| Acids                 | pKa <sup>a</sup><br>(exp) | HF    | LSDA  | PBE   | B3LYP | CAM<br>B3LYP | WB97XD | M062X | B2PLYP |
|-----------------------|---------------------------|-------|-------|-------|-------|--------------|--------|-------|--------|
| Acetic                | 4.76                      | 0.99  | -0.93 | 0.64  | -0.09 | -0.92        | -0.22  | -0.45 | 0.76   |
| Propanoic             | 4.88                      | -0.94 | -0.38 | -0.40 | -1.43 | -1.13        | -0.44  | -0.44 | 0.41   |
| Butanoic              | 4.82                      | 0.09  | -0.41 | 0.78  | 0.02  | -0.32        | -0.12  | -0.44 | 0.51   |
| Pentanoic             | 4.82                      | -0.88 | -0.83 | -1.20 | -0.98 | -0.74        | -1.30  | -0.44 | -1.04  |
| Hexanoic              | 4.85                      | -0.90 | 0.33  | -0.41 | -1.25 | -0.88        | -0.33  | -0.38 | 0.27   |
| Chloroacetic          | 2.86                      | 2.30  | 0.86  | 1.35  | 1.33  | 1.27         | 1.42   | 1.04  | 1.27   |
| Bromoacetic           | 2.90                      | 1.86  | 0.51  | 0.43  | 0.82  | 1.04         | 0.30   | 1.04  | 1.06   |
| Trichloroacetic       | 0.70                      | 4.27  | 1.31  | 2.61  | 2.31  | 2.27         | 3.22   | 2.63  | 3.48   |
| 2-Chlorobutanoic      | 2.83                      | 0.24  | 0.79  | 0.74  | 0.84  | 0.81         | 0.52   | 1.14  | 1.58   |
| 3-Chlorobutanoic      | 3.98                      | 1.24  | 0.11  | 0.72  | -0.27 | 0.10         | 0.03   | 0.51  | 0.65   |
| 4-Chlorobutanoic      | 4.52                      | 1.50  | -0.10 | 1.16  | 0.76  | 0.88         | 0.64   | 1.37  | 1.03   |
| 3-Butenoic            | 4.35                      | 0.55  | -0.44 | 0.28  | -0.27 | -0.07        | 0.00   | 0.14  | 0.16   |
| 2-Methylpropanoic     | 4.84                      | 1.37  | -0.10 | 0.12  | -0.09 | 0.16         | 0.47   | 0.30  | 0.72   |
| 2,2-Dimethylpropanoic | 5.03                      | 0.01  | 0.01  | 0.18  | -0.65 | 0.30         | 0.38   | -0.34 | 0.30   |
| 3-Methylbutanoic      | 4.77                      | 0.30  | -0.03 | 0.91  | -1.10 | -0.77        | -0.01  | 0.23  | 0.16   |
| 2-Methylbutanoic      | 4.80                      | 0.63  | 0.04  | 0.46  | 0.15  | -0.08        | 0.78   | -0.70 | -0.54  |
| 2-Butynoic            | 2.62                      | 3.01  | 0.45  | 1.01  | 0.38  | 1.41         | 1.18   | 0.87  | 1.26   |
| 2-Chloropropanoic     | 2.83                      | 0.71  | 0.02  | 1.32  | 0.54  | 0.22         | 1.08   | 0.54  | 1.41   |
| 3-Bromopropanoic      | 4.00                      | 2.06  | 0.88  | 2.13  | 0.52  | 0.80         | 0.46   | 0.36  | 1.83   |
| 3-Chloropropanoic     | 3.98                      | 1.30  | 0.32  | 1.34  | 0.73  | 1.24         | 2.19   | 0.82  | 1.03   |
| trans-Crotonic        | 4.69                      | 1.05  | -0.26 | -0.21 | 0.28  | 0.17         | -0.64  | 0.72  | 0.33   |
| Formic                | 3.75                      | 3.02  | 1.03  | 1.60  | 1.12  | 1.11         | 1.47   | 0.91  | 2.03   |

a. Data from references <sup>64</sup> and <sup>65</sup>.
